# Supplementary material for: The ZBED6–IGF2 axis has a major effect on growth of skeletal muscle and internal organs in placental mammals
Source: PubMed Central journal article supplement — Proc Natl Acad Sci U S A. 2018 Feb 12;115(9):E2048–57. doi: 10.1073/pnas.1719278115 (PMC5834713; doi:10.1073/pnas.1719278115), 2018-02-12
Supplement: pnas.201719278SI.pdf [file pnas.201719278SI.pdf]

# Supporting Information

Younis et al. 10.1073/pnas.1719278115

## SI Text

**Transcriptome Analysis Using Heart.** In cardiac muscle tissues, the expression of 123 and 182 genes was found to be significantly changed in *Zbed6*<sup>-/-</sup> and *Igf2*<sup>pA/mG</sup> females, respectively, with 70 DE genes in common (Fig. S3A). The GO analysis of DE genes in *Zbed6*<sup>-/-</sup> and *Igf2*<sup>pA/mG</sup> showed a significant enrichment in genes related to the extracellular space (Fig. S3B). The expression profile of the cardiac muscle of males revealed fewer DE genes than in females, with only five DE genes in common between *Zbed6*<sup>-/-</sup> and *Igf2*<sup>pA/mG</sup> males (Fig. S3C). Moreover, the change in expression of *Igf2*, *Enho*, and *Tmem8* genes among genotypes in cardiac muscle were strikingly similar to the pattern observed in skeletal muscle (Fig. S3D). Furthermore, the paired immunoglobulin-like type 2 receptor-associating neural protein (*Pianp*) gene was among the most significantly up-regulated genes in *Zbed6*<sup>-/-</sup> cardiac tissues (Fig. S3E). This gene is predicted as a direct target of ZBED6, with a ZBED6 binding site at its promoter, as observed for the *Enho* promoter (Fig. S4B).

**Transcriptome Analysis of Kidney Tissue.** This revealed significant changes in the expression of 165 genes in *Zbed6*<sup>-/-</sup>, but only 36 genes in *Igf2*<sup>pA/mG</sup> in male mice (Fig. S3F). The GO analysis of the DE genes in kidney of male *Zbed6*<sup>-/-</sup> mice showed a significant enrichment of genes related to extracellular exosome, mitochondrial membrane, and oxidative phosphorylation (Fig. S3G). Moreover, transcriptome analysis of kidney of female mice revealed ~250 DE genes in each of the *Zbed6*<sup>-/-</sup> and *Igf2*<sup>pA/mG</sup> groups, with 159 DE genes (~60%) in common (Fig. S3H). The GO analysis of the DE genes in *Zbed6*<sup>-/-</sup> kidney revealed a significant enrichment of genes related to extracellular space and transporter activities (Fig. S3 I and J). *Igf2* was markedly up-regulated in the kidney of both *Zbed6*<sup>-/-</sup> and *Igf2*<sup>pA/mG</sup> males and females (Fig. S3K). Furthermore, *Enho* and *Pianp* were up-regulated only in kidney of *Zbed6*<sup>-/-</sup> mice; there were no changes in *Tmem8* expression in any genotype (Fig. S3K).

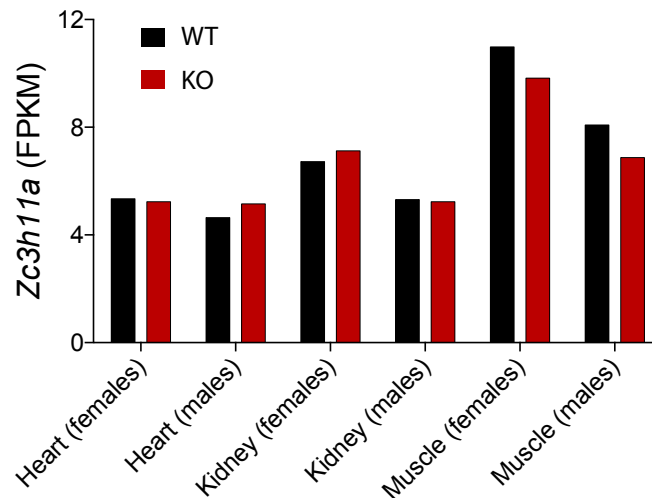

Fig. S1. No altered expression of the *Zc3h11a* gene in *Zbed6*<sup>-/-</sup> mice. The RNAseq data did not reveal any altered expression of the “host” gene *Zc3h11a* after *Zbed6* inactivation in any of the tissues studied.

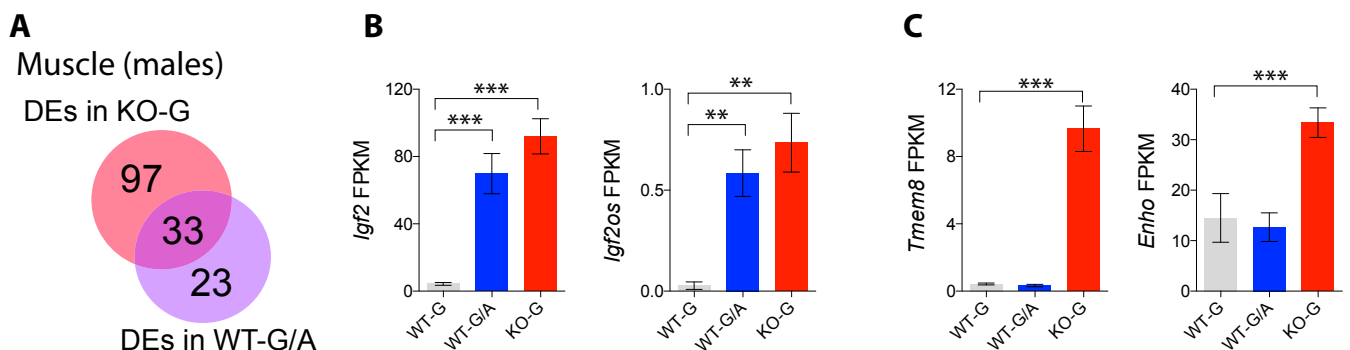

Fig. S2. Transcriptome analysis of the tibialis anterior muscle in *Igf2*<sup>pA/mG</sup> and *Zbed6*<sup>-/-</sup> male mice. (A) Overlap between DE genes in skeletal muscle of KO-G and WT-G/A male mice. (B) The expression of *Igf2* and *Igf2os*. (C) Expression analysis of *Tmem8* and *Enho* genes. Results are means  $\pm$  SEM \**P* < 0.05; \*\**P* < 0.01; \*\*\**P* < 0.001, after Benjamini–Hochberg correction for multiple testing.

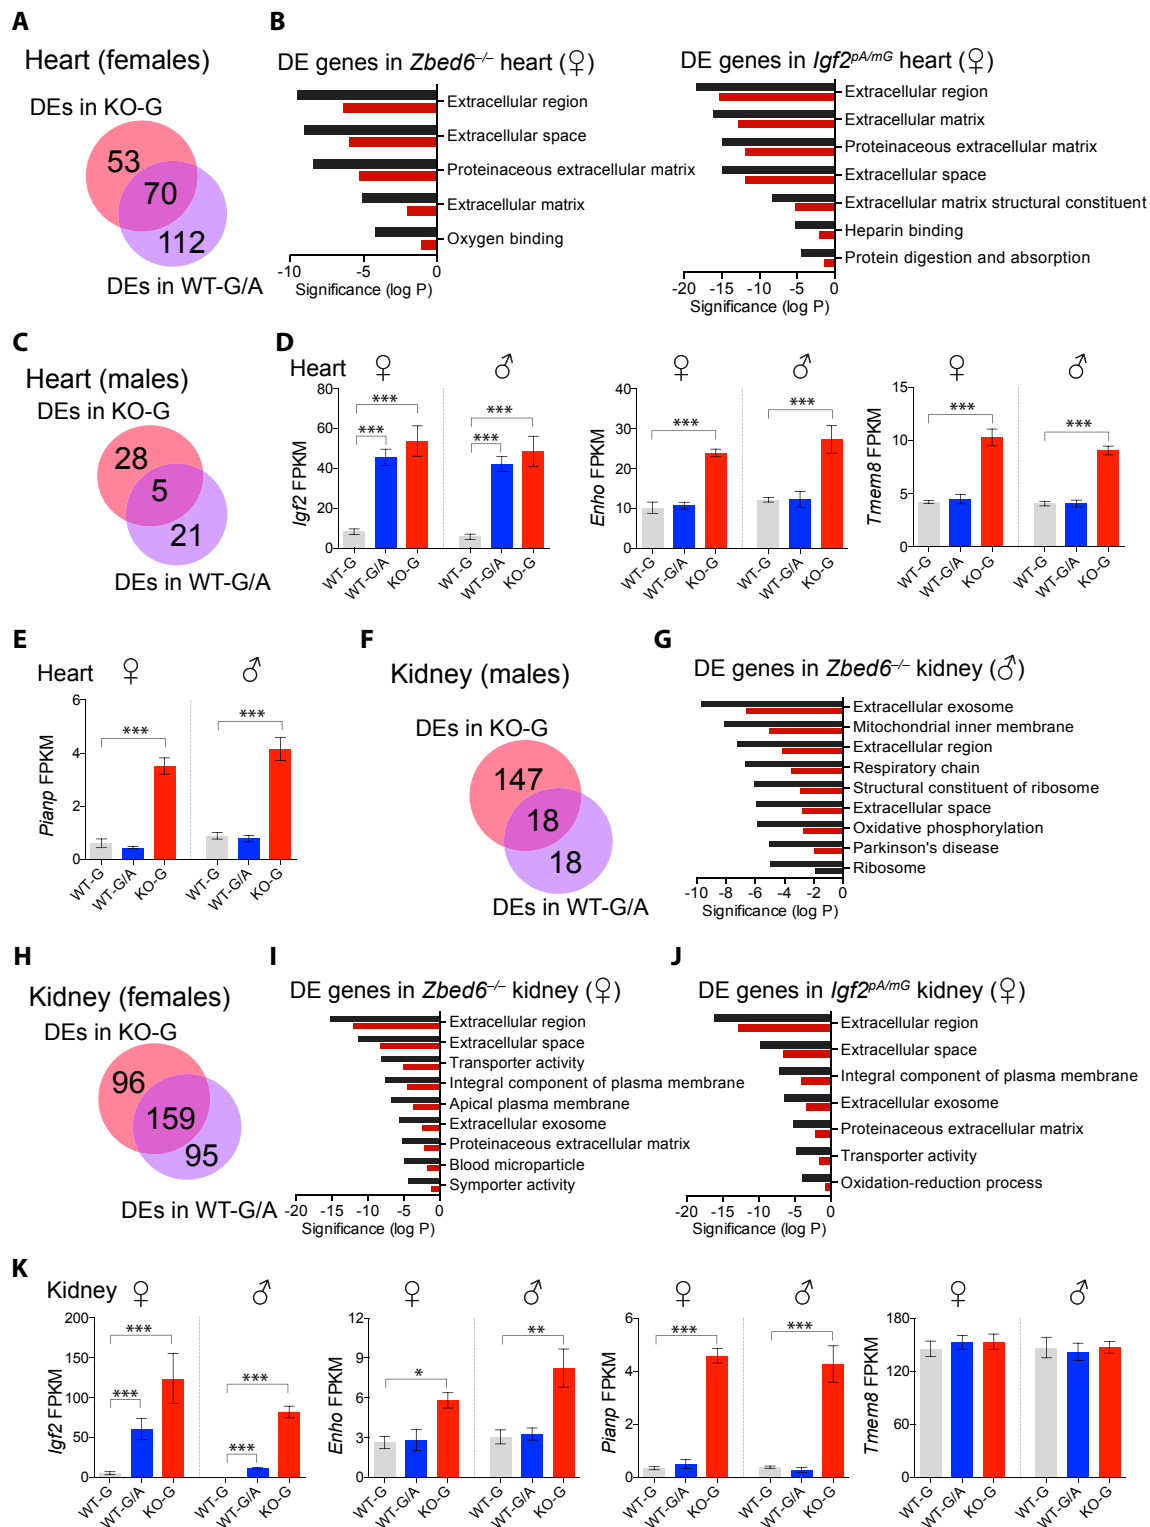

**Fig. S3.** Transcriptome analysis of heart and kidney tissue in *Igf2*<sup>pa/mG</sup> and *Zbed6*<sup>-/-</sup> mice. Overlap between DE genes in cardiac muscle of KO-G and WT-G/A female mice (A) and gene ontology (GO) analysis of DE genes in this comparison (B). (C) Overlap between DE genes in cardiac muscle of KO-G and WT-G/A male mice. (D and E) Expression of *Igf2*, *Enho*, *Tmem8*, and *Piamp* transcripts as measured by FPKM values in cardiac muscle of male and female mice. (F) Overlap between DE genes in kidney of KO-G and WT-G/A male mice and GO analysis of DE genes in kidney tissue of male KO-G mice. (G) GO analysis of DE genes in kidney of KO-G male mice. (H) Overlap between DE genes in kidney of KO-G and WT-G/A female mice. (I and J) GO analysis of DE genes in kidney of KO-G (I) and WT-G/A (J) female mice. (K) Expression of *Igf2*, *Enho*, *Tmem8*, and *Piamp* in kidney tissue of male and female mice. Results are means  $\pm$  SEM \* $P$  < 0.05; \*\* $P$  < 0.01; \*\*\* $P$  < 0.001, after Benjamini–Hochberg correction for multiple testing. (B, G, I, and J) Black bars represent  $P$  values, and red bars represent false discovery rate (FDR).

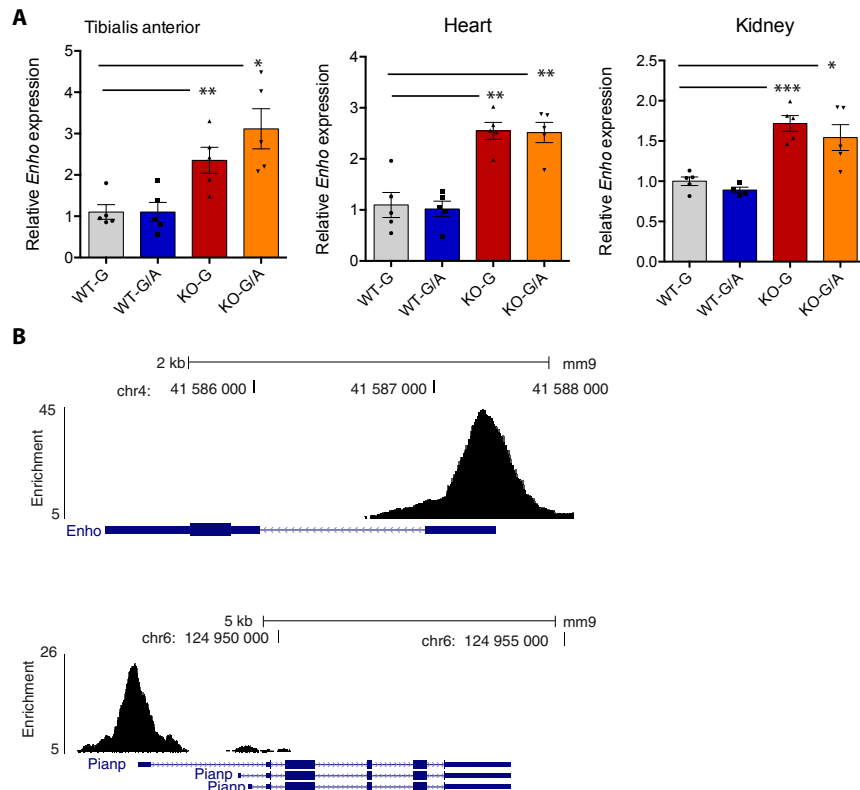

**Fig. 54.** qPCR analysis and previously published ZBED6 ChIP-seq data. (A) qPCR analysis of *Enho* expression in adult tissues (muscle, heart, and kidney) from the four *Zbed6/Igf2* genotypes; the relative expression compared with the WT-G group is indicated. Results are means  $\pm$  SEM \* $P$  < 0.05; \*\* $P$  < 0.01; \*\*\* $P$  < 0.001; Student's  $t$  test. (B) ChIP-seq data from Jiang et al. (1) showing the ZBED6 peak over the *Enho* and *P1anp* promoters in mouse myoblast C2C12 cells.

1. Jiang L, et al. (2014) ZBED6 modulates the transcription of myogenic genes in mouse myoblast cells. *PLoS One* 9:e94187.

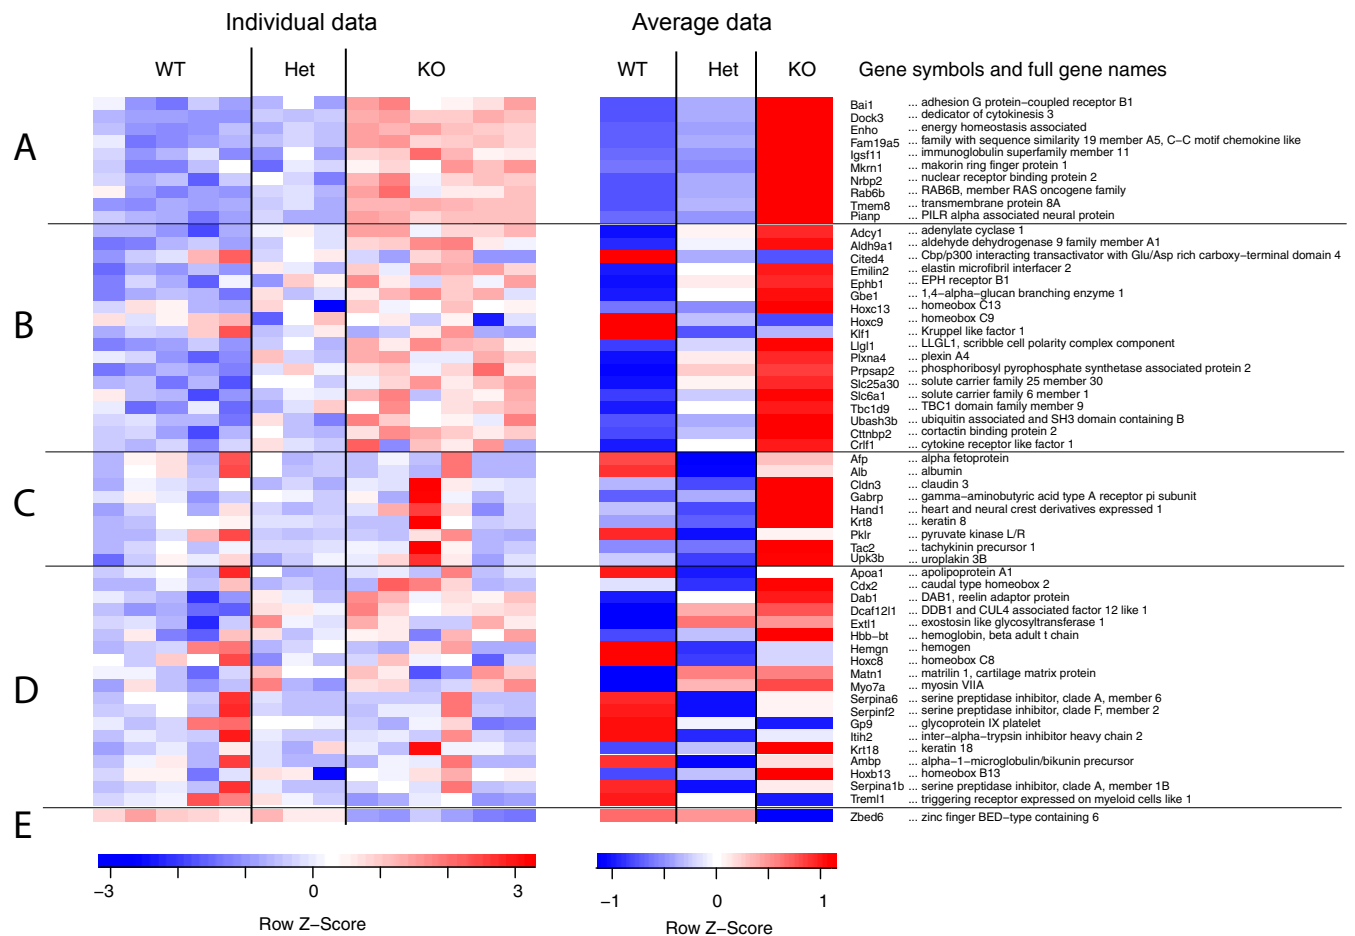

**Fig. S5.** DE between *Zbed6*<sup>+/+</sup> (WT) and *Zbed6*<sup>-/-</sup> (KO) mice in fetal muscle tissue based on RNA-seq data including data on *Zbed6*<sup>+/-</sup> heterozygotes (Hets). (Left) Individual data. (Right) Average data for each genotype class. (A) Genes associated with ZBED6 ChIP-seq peaks showing significant DE between Hets and KOs. (B) Genes associated with ZBED6 ChIP-seq peaks but with no significant DE between Hets and KOs. (C) Genes not associated with any ZBED6 ChIP-seq peaks but showing significant DE between Hets and KOs. (D) Genes not associated with ZBED6 ChIP-seq peaks and no significant DE between Hets and KOs. (E) Expression of *Zbed6* in the three different genotypes.

**Dataset S1. Gene ontology analysis of differentially expressed genes in *Zbed6* knock-out (KO) or *Igf2* knock-in (KI) mice skeletal muscle (tibialis anterior), heart, and kidney tissues**

[Dataset S1](#)

**Dataset S2. Lists of all differentially expressed genes in *Zbed6* knock-out (KO) or *Igf2* knock-in (KI) mice in skeletal muscle (tibialis anterior), heart, and kidney tissues**

[Dataset S2](#)
